# Supplementary material for: Novel Microarrays for Simultaneous Serodiagnosis of Multiple Antiviral Antibodies
Source: PubMed Central journal article supplement (PMC3867344; doi:10.1371/journal.pone.0081726), 2013-12-18
Supplement: pone.0081726.s001.pdf [file pone.0081726.s001.pdf]

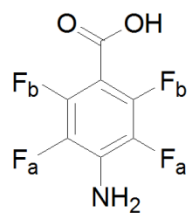

Figure S1 The position of two sets of fluorine atoms (F<sub>a</sub> and F<sub>b</sub>) in 4-amino-2,3,5,6-tetrafluorobenzoic acid.
